# Supplementary material for: The Chimeric Adenovirus (Ad5/35) Expressing Engineered Spike Protein Confers Immunity against SARS-CoV-2 in Mice and Non-Human Primates
Source: MDPI journal article supplement (doi:10.3390/vaccines10050712), 2022-04-30
Supplement: s1 [file s1]

Supplementary Figure S1. Construction of candidate Adenovirus vectored vaccine against SARS-CoV-2

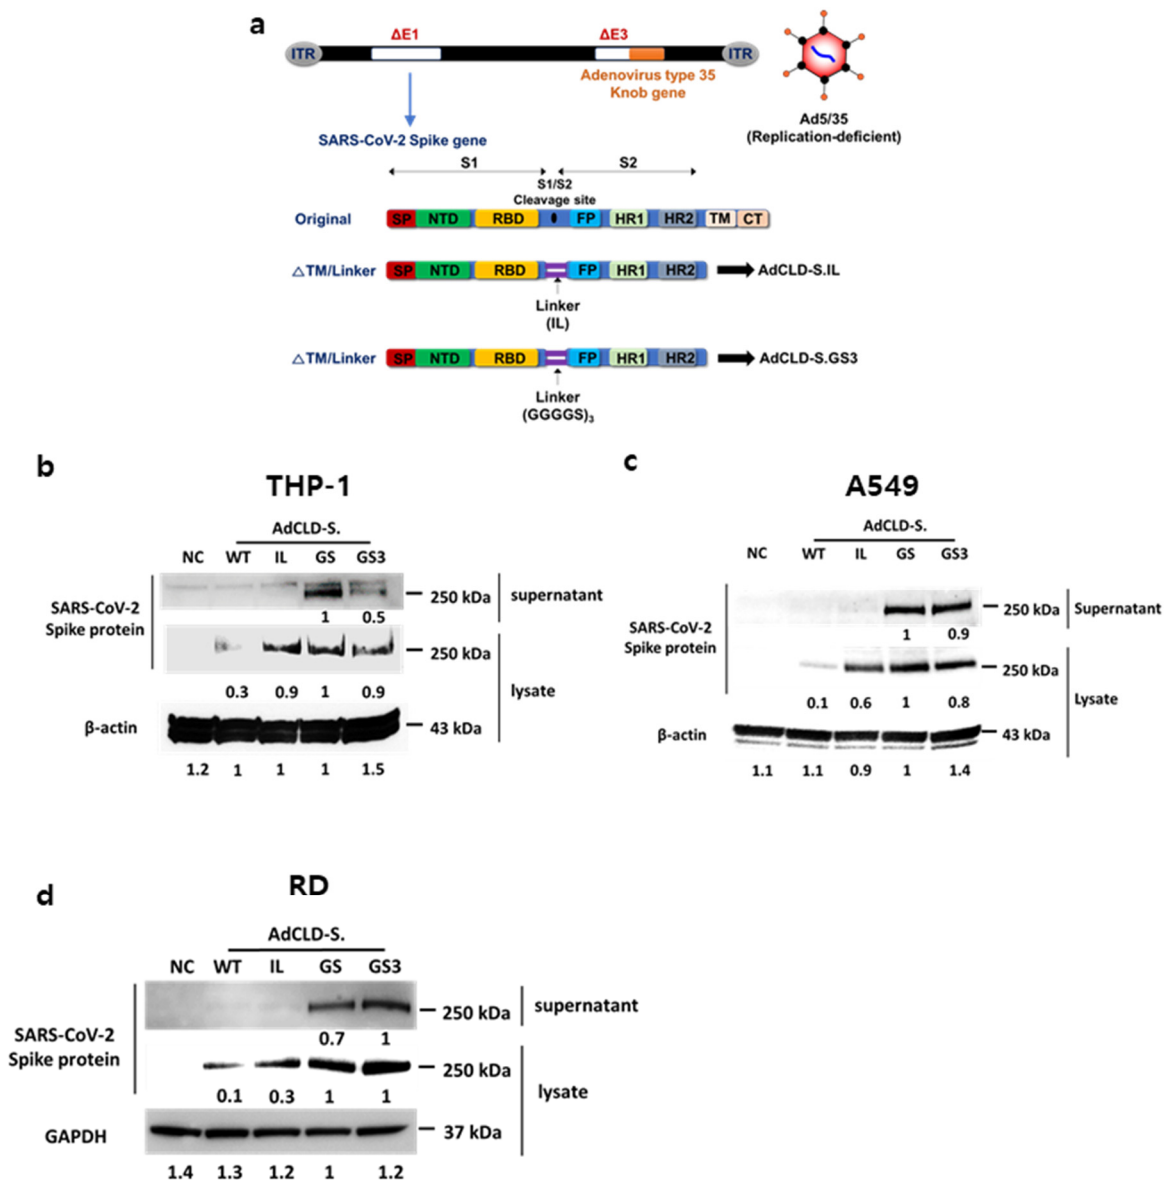

(a) Schematic diagram of the structure of adenovirus vectored vaccine harbored with modified SARS-CoV-2 S protein. (b–d) AdCLD-S.WT, AdCLD-S.IL, AdCLD-CoV19 or AdCLD-S.GS3 was transformed into THP-1 (b), A549 (c), RD (d) cell line (each  $2.5 \times 10^5$  cells) at each 25 MOI. The accumulation level of S protein secretion was verified by Western blot analysis after harvesting supernatant (40 ug/well) and cell lysate (40 ug/well) of cells transformed with each vaccine candidates. SP, signal sequence; NTD, N-terminal domain RBD, receptor-binding domain; FP, fusion peptide; HR1, heptad repeat 1; HR2, heptad repeat 2; TM, transmembrane domain; CT, cytoplasmic tail; NC, Negative control

Supplementary Figure S2. Establishment of hACE2-expressing cell line for neutralizing antibody assay

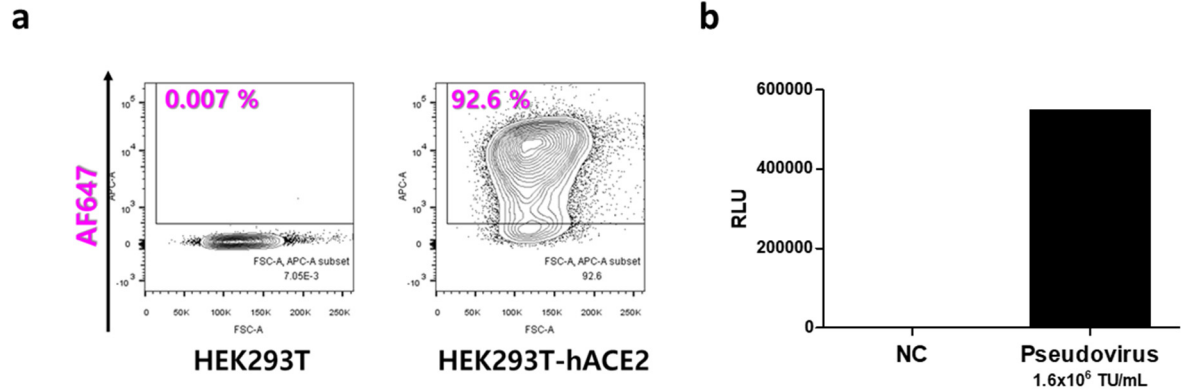

The HEK293T-hACE2 cell line was established by transducing a lentivirus harboring a human ACE2 gene into HEK293T cells. **(a)** HEK293T-hACE2 cell line was reacted with AF647 conjugated anti-hACE2 antibody and analyzed by flow cytometry. **(b)** The neutralizing antibody assay using HEK293T-hACE2 was verified through infection of the pseudotyped lentivirus (Wuhan-Hu-1 wild-type,  $1.6 \times 10^6$  TU/mL) loaded with a reporter gene, luciferase. NC, Negative Control; RLU, Relative Light Unit.

Supplementary Figure S3. Immunogenicity of AdCLD-CoV19 in macaques before SARS-CoV-2 challenge

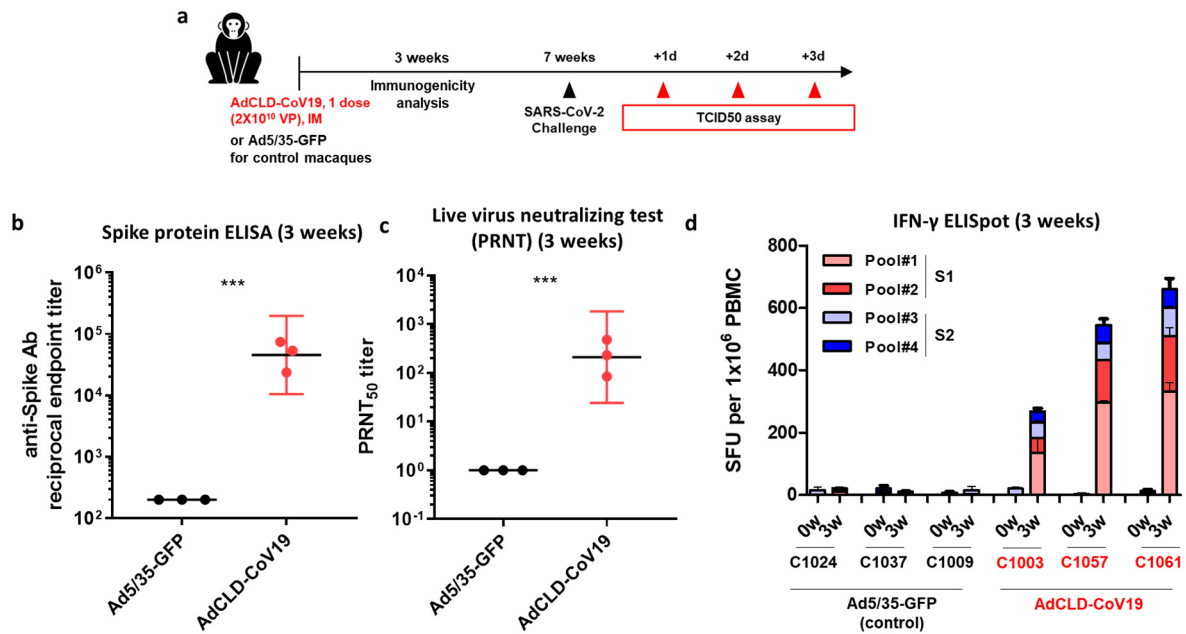

(a) AdCLD-CoV19-vaccinated cynomolgus macaques and control vector (Ad5/35-GFP)-administered macaques at day 0. 3 weeks after vaccination, serums and PBMCs were collected from macaques and immunogenicity analysis were conducted as follows: (b) binding Ab titers by ELISA, (c) Neutralizing Ab titers by Plaque-reduction neutralizing test (PRNT), and (d) cellular immunity by ELISpot. \*\*\*,  $p < 0.001$ ; ns, not significant.

# Supplementary Figure S4. The comparison of the properties of AdCLD-CoV19 and AdCLD-CoV19-1

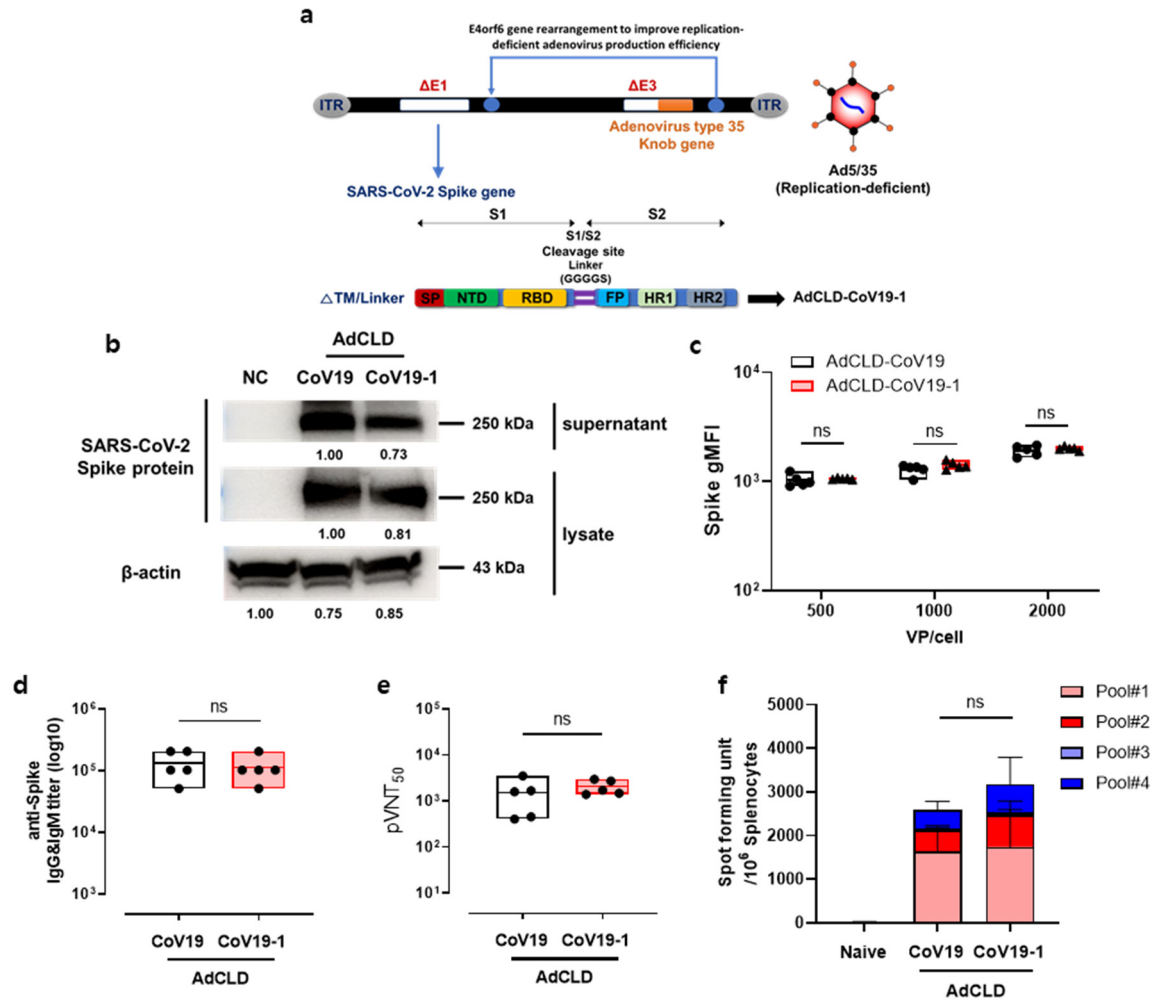

(a) AdCLD-CoV19-1 structural schematic diagram. The antigen in AdCLD-CoV19-1 is structurally identical to AdCLD-CoV19, and the E4orf6 gene was rearranged to the E1 deletion region to enhance replication-deficient adenovirus production. (b) At each 25 MOI, AdCLD-CoV19 or AdCLD-CoV19-1 was transformed into A549 cell line ( $2.5 \times 10^5$  cells). Western blot analysis verified the level of S protein secretion accumulation after harvesting supernatant (40 ug/well) and cell lysate (40 ug/well) from transformed cells. (c) AdCLD-CoV19 and AdCLD-CoV19-1 were infected at 500, 1000, and 2000 VP/cell in the A549 cell line. The antigen expression levels of each vaccine were compared by flow cytometry (geometric mean; gMFI). (d–f) The 8-week sera of BALB/c mice immunized with each  $1 \times 10^9$  VP AdCLD-CoV19 or AdCLD-CoV19-1 were analyzed for differences between vaccines by ELISA (d) and neutralizing antibody activity assay (e). (f) IFN- $\gamma$ -secreting T cells were measured by ELISpot assay from vaccinated Balb/c mice at 4 weeks splenocytes that stimulated with each peptide pools. All graphs,

except the (f) graph, are displayed with floating bar (min to max) boxes and mean values indicated by inner lines. ns, not significant. SP, signal sequence; NTD, N-terminal domain RBD, receptor-binding domain; FP, fusion peptide; HR1, heptad repeat 1; HR2, heptad repeat 2; TM, transmembrane domain; CT, cytoplasmic tail; NC, Negative control. ns, not significant.

Supplementary Figure S5. Western blotting raw data

**a THP-1 cell line**

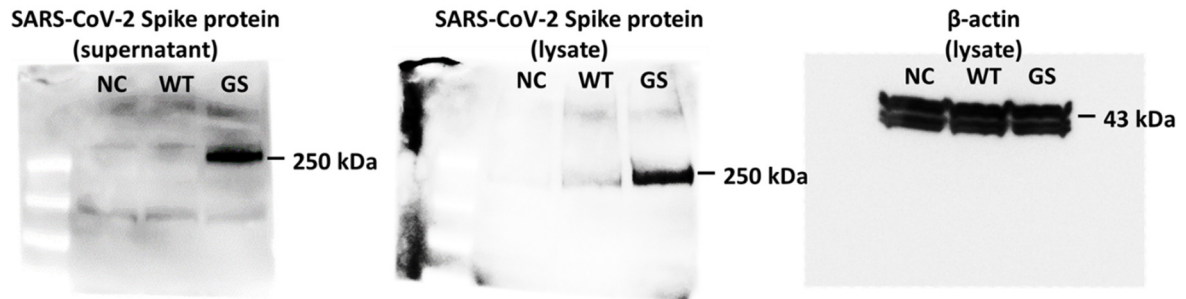

**b A549 cell line**

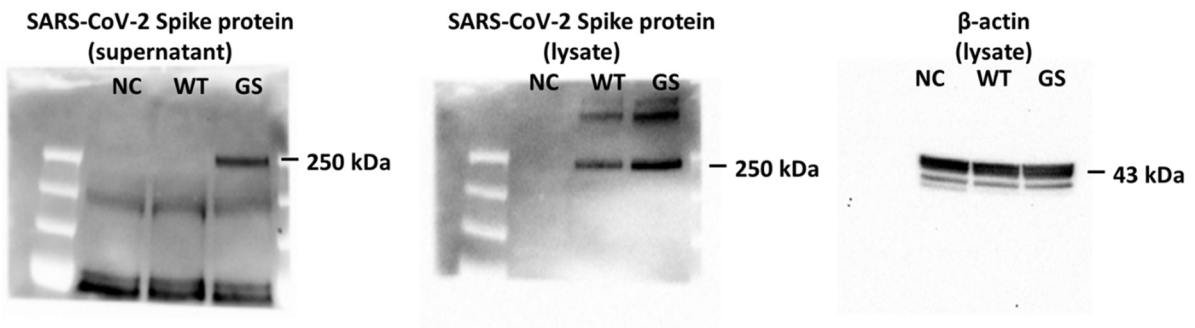

**c RD cell line**

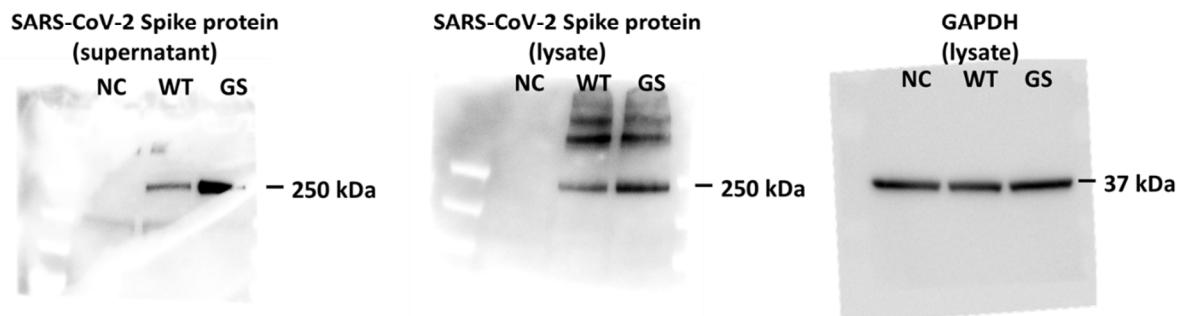

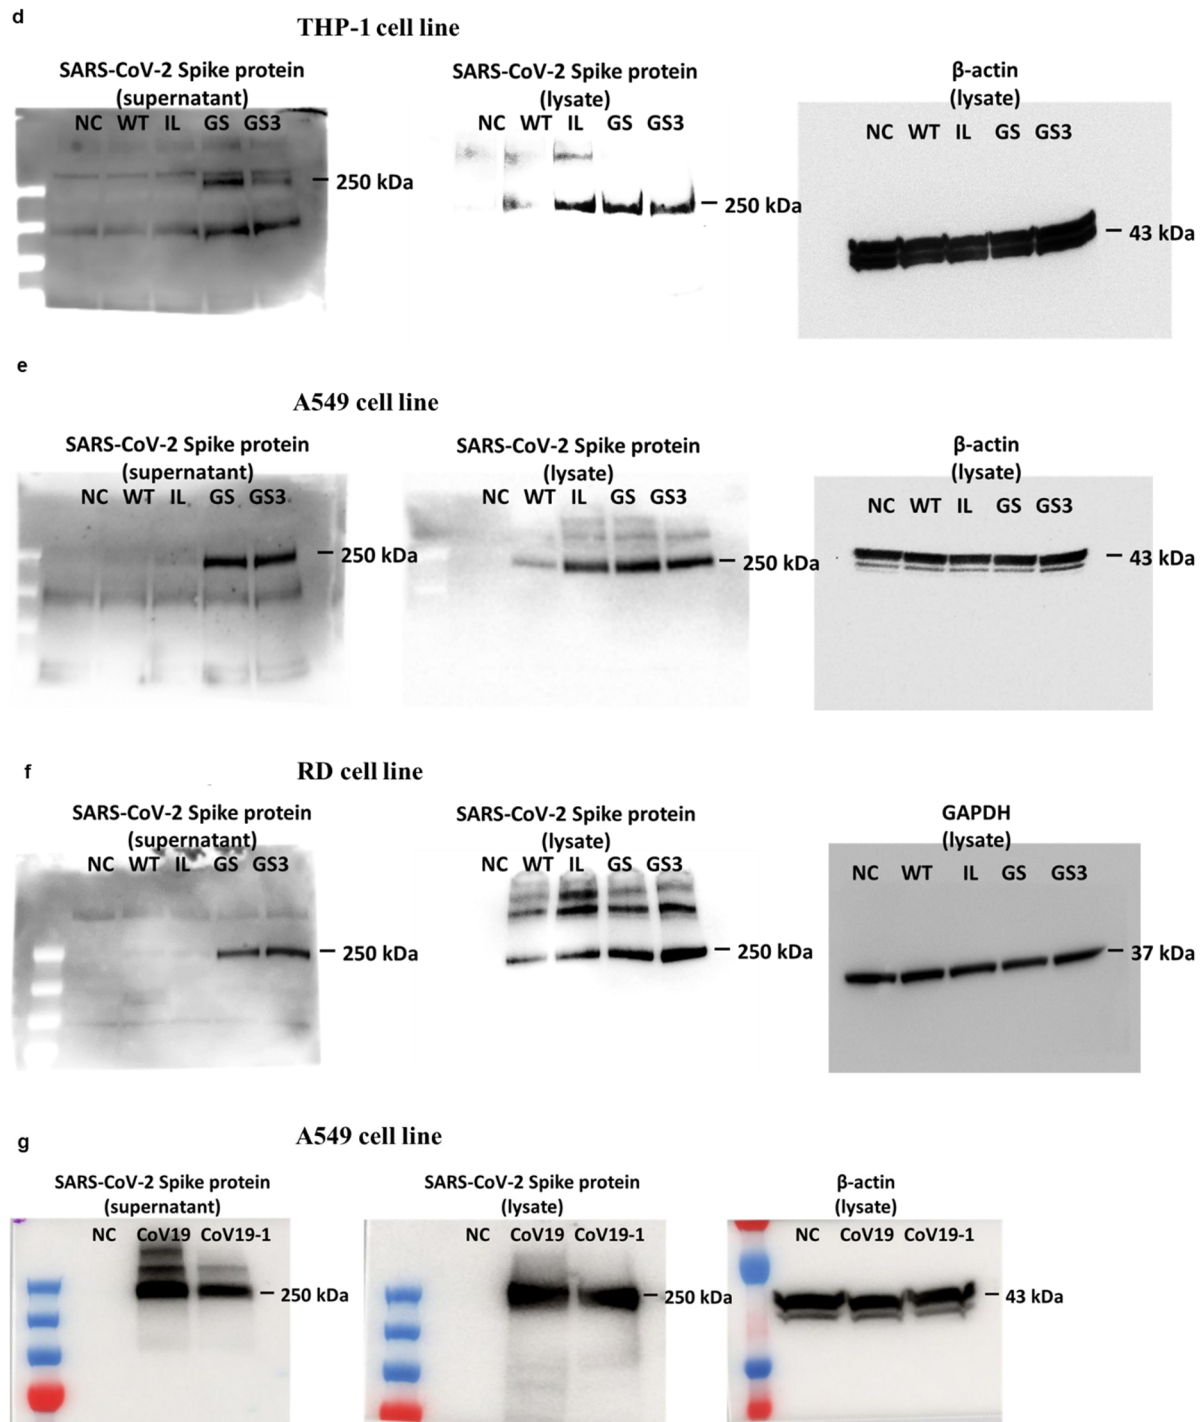

Uncropped images of western blots shown in Figure 1b–d (a–c), Supplementary Figure S1b–d (d–f) and Supplementary Figure S4b (g).

**Supplementary Table S1. Statistical summary of humoral immunity induced by AdCLD-CoV19 in mice. Related to Figure 2**

**[Figure 2a and 2c] Spike protein ELISA (GMT with 95% CI)**

| Vaccination                                                        | Weeks post vaccination |                         |                         |                           |                           |                           |                           |
|--------------------------------------------------------------------|------------------------|-------------------------|-------------------------|---------------------------|---------------------------|---------------------------|---------------------------|
|                                                                    | 0w                     | 2w                      | 3w                      | 4w                        | 5w                        | 6w                        | 7w                        |
| <b>AdCLD-S.WT</b><br><b>(1×10<sup>9</sup> VP)</b><br><b>(N=5)</b>  | 200<br>(200, 200)      | 33779<br>(21083, 54123) | 29407<br>(14313, 60419) | 44572<br>(21694, 91578)   | 33779<br>(12661, 90121)   | 51200<br>(27859, 94096)   | 33779<br>(12661, 90121)   |
| <b>AdCLD-CoV19</b><br><b>(1×10<sup>9</sup> VP)</b><br><b>(N=5)</b> | 200<br>(200, 200)      | 44572<br>(21694, 91578) | 58813<br>(40024, 86424) | 117627<br>(57251, 241675) | 135118<br>(84331, 216490) | 135118<br>(84331, 216490) | 155209<br>(96870, 248682) |
| <b>AdCLD-CoV19</b><br><b>(2×10<sup>8</sup> VP)</b><br><b>(N=5)</b> | 200<br>(200, 200)      | 22286<br>(10847, 45789) | 44572<br>(21694, 91578) | 58813<br>(28625, 120837)  | 58813<br>(22910, 150983)  | 102400<br>(43303, 242146) | 102400<br>(55718, 188192) |

**[Figure 2b] Pseudovirus neutralization test (GMT with 95% CI)**

| Vaccination                                                        | Weeks post vaccination  |                         |                         |                         |
|--------------------------------------------------------------------|-------------------------|-------------------------|-------------------------|-------------------------|
|                                                                    | 0w                      | 3w                      | 5w                      | 7w                      |
| <b>AdCLD-S.WT</b><br><b>(1×10<sup>9</sup> VP)</b><br><b>(N=4)</b>  | 28.75<br>(11.26, 73.39) | 62.47<br>(23.31, 167.4) | 142.4<br>(45.39, 446.8) | 226.2<br>(61.96, 825.6) |
| <b>AdCLD-CoV19</b><br><b>(1×10<sup>9</sup> VP)</b><br><b>(N=4)</b> | 37.23<br>(18.06, 76.74) | 179.7<br>(73.71, 438.2) | 516.8<br>(383.6, 696.4) | 1468<br>(1104, 1951)    |

**[Figure 2d] Pseudovirus neutralization test (GMT with 95% CI)**

| Vaccination                                                        | Weeks post vaccination  |                         |                         |                         |
|--------------------------------------------------------------------|-------------------------|-------------------------|-------------------------|-------------------------|
|                                                                    | 0w                      | 2w                      | 4w                      | 6w                      |
| <b>AdCLD-CoV19</b><br><b>(1×10<sup>9</sup> VP)</b><br><b>(N=4)</b> | 33.97<br>(17.88, 64.55) | 68.85<br>(30.19, 157.1) | 403.0<br>(339.1, 479.1) | 812.4<br>(201.7, 3273)  |
| <b>AdCLD-CoV19</b><br><b>(2×10<sup>8</sup> VP)</b><br><b>(N=4)</b> | 38.48<br>(19.55, 75.72) | 74.67<br>(31.75, 175.6) | 252.8<br>(145.8, 438.2) | 411.3<br>(211.8, 798.7) |



**Supplementary Table S2. Statistical summary of humoral immunity induced by AdCLD-CoV19 in non-human primates. Related to Figure 3**

**[Figure 3a and 3d] Spike protein ELISA (GMT\* with min to max)**

| Vaccination                                            | Weeks post vaccination |                          |                          |                         |                          |
|--------------------------------------------------------|------------------------|--------------------------|--------------------------|-------------------------|--------------------------|
|                                                        | 0w                     | 2w                       | 3w                       | 4w                      | 5w                       |
| <b>AdCLD-S.WT</b><br>(1×10 <sup>11</sup> VP)<br>(N=2)  | 100<br>(100, 100)      | 36204<br>(25600, 51200)  | 25600<br>(25600, 25600)  | 25600<br>(25600, 25600) | 25600<br>(25600, 25600)  |
| <b>AdCLD-CoV19</b><br>(1×10 <sup>11</sup> VP)<br>(N=2) | 100<br>(100, 100)      | 72408<br>(51200, 102400) | 51200<br>(51200, 51200)  | 51200<br>(51200, 51200) | 51200<br>(25600, 102400) |
| <b>AdCLD-CoV19</b><br>(2×10 <sup>10</sup> VP)<br>(N=3) | 100<br>(100, 100)      | 64508<br>(51200, 102400) | 64508<br>(51200, 102400) | 25600<br>(12800, 51200) | 32254<br>(12800, 51200)  |
| <b>AdCLD-CoV19</b><br>(4×10 <sup>9</sup> VP)<br>(N=3)  | 100<br>(100, 100)      | 10159<br>(6400, 12800)   | 16127<br>(12800, 25600)  | 12800<br>(12800, 12800) | 12800<br>(12800, 12800)  |

**[Figure 3b] Pseudovirus neutralization test (GMT with min to max)**

| Vaccination                                            | Weeks post vaccination  |                         |                         |                         |                         |
|--------------------------------------------------------|-------------------------|-------------------------|-------------------------|-------------------------|-------------------------|
|                                                        | 0w                      | 2w                      | 3w                      | 4w                      | 5w                      |
| <b>AdCLD-S.WT</b><br>(1×10 <sup>11</sup> VP)<br>(N=2)  | 18.99<br>(17.85, 20.20) | 215.2<br>(127.6, 363.1) | 185.3<br>(110.2, 311.7) | 171.2<br>(103.1, 284.3) | 100.8<br>(92.55, 109.8) |
| <b>AdCLD-CoV19</b><br>(1×10 <sup>11</sup> VP)<br>(N=2) | 14.62<br>(10.00, 21.38) | 378.1<br>(255.4, 559.7) | 297.1<br>(224.9, 392.4) | 415.2<br>(358.3, 481.1) | 352.9<br>(314.0, 396.6) |

**[Figure 3c] Focus reduction neutralization test (individual data)**

| Vaccination                                            | Weeks post vaccination            |  |
|--------------------------------------------------------|-----------------------------------|--|
|                                                        | 3w                                |  |
| <b>AdCLD-S.WT</b><br>(1×10 <sup>11</sup> VP)<br>(N=2)  | Monkey 1: 1104<br>Monkey 2: 561.1 |  |
| <b>AdCLD-CoV19</b><br>(1×10 <sup>11</sup> VP)<br>(N=2) | Monkey 3: 1372<br>Monkey 4: 2701  |  |

**[Figure 3e] Pseudovirus neutralization test (GMT with min to max)**

| Vaccination                                             | Weeks post vaccination  |                         |                         |                         |                         |
|---------------------------------------------------------|-------------------------|-------------------------|-------------------------|-------------------------|-------------------------|
|                                                         | 0w                      | 2w                      | 3w                      | 4w                      | 5w                      |
| <b>AdCLD-CoV19<br/>(1×10<sup>11</sup> VP)<br/>(N=2)</b> | 32.72<br>(28.19, 37.97) | 449.9<br>(235.4, 859.9) | 353.6<br>(217.2, 575.6) | 415.2<br>(358.3, 481.1) | 352.9<br>(314.0, 396.6) |
| <b>AdCLD-CoV19<br/>(2×10<sup>10</sup> VP)<br/>(N=3)</b> | 46.85<br>(39.85, 56.85) | 219.4<br>(115.1, 306.5) | 131.7<br>(85.58, 230.3) | 229.5<br>(115.4, 611.4) | 265.9<br>(188.7, 453.5) |
| <b>AdCLD-CoV19<br/>(4×10<sup>9</sup> VP)<br/>(N=3)</b>  | 48.50<br>(46.28, 51.53) | 45.23<br>(32.51, 65.91) | 47.23<br>(31.55, 77.90) | 37.14<br>(26.58, 63.11) | 57.14<br>(41.65, 79.02) |

\* 95% CI was not considered in NHP studies due to a small number of animal.

**Supplementary Table S3. Materials and Methods primer list**

| Candidates                                                        | Orientation | Sequence (5' → 3')                                                  | Mer |
|-------------------------------------------------------------------|-------------|---------------------------------------------------------------------|-----|
| <b>AdCLD-S.WT</b>                                                 | Forward     | TCC AGC CTC CGA TTT GCC ACC ATG TTT GTG TTC CTG G                   | 37  |
|                                                                   | Reverse     | GAT TAT GAT CAA TTT TCA TGG CCA CTT GAT GTA TTG TTC                 | 39  |
| <b>TNSPRRAR<br/>→ TILR<br/>(AdCLD-S.IL)</b>                       | Forward     | AGA CCA TCC TCA GGT CTG TGG CAA GCC AGA G                           | 31  |
|                                                                   | Reverse     | CCT CCT ACC AGA CCC AGA CCA TCC TCA GGT                             | 30  |
| <b>TNSPRRAR<br/>→ TGGGGSR<br/>(AdCLD-S.GS or<br/>AdCLD-CoV19)</b> | Forward     | CGG TGG CGG TGG GTC GAG GTC TGT GGC AAG CCA GAG                     | 36  |
|                                                                   | Reverse     | GAC CCA CCG CCA CCG GTC TGG GTC TGG TAG GAG G                       | 34  |
| <b>TNSPRRAR<br/>→ T(GGGGS)3R<br/>(AdCLD-S.GS3)</b>                | Forward     | GGG CGG TGG TGG GTC GGG TGG CGG CGG TTC CAG GTC TGT GGC AAG CCA GAG | 51  |
|                                                                   | Reverse     | GAC CCA CCA CCG CCC GAC CCA CCG CCA CCG GTC TGG GTC TGG TAG GAG G   | 49  |

**Supplementary Table S4. Sequences of SARS-CoV-2 spike protein peptide library**

| Peptide ID | Sequence (N' - C') | Subunit   | Pool<br>(No. of peptides in pool) |
|------------|--------------------|-----------|-----------------------------------|
| 1          | MFVFLVLLPLVSSQC    | <b>S1</b> | <b>Pool #1<br/>(49)</b>           |
| 2          | LPLVSSQCVNLTTRT    |           |                                   |
| 3          | CVNLTT RTQLPPAYT   |           |                                   |
| 4          | TQLPPAYTN SFTRGV   |           |                                   |
| 5          | TNSFTRGVYYPDKVF    |           |                                   |
| 6          | VYYPDKVFRSSVLHS    |           |                                   |
| 7          | FRSSVLHSTQDLFLP    |           |                                   |
| 8          | STQDLFLPFFSNVTW    |           |                                   |
| 9          | PFFSNVTWFHAIHVS    |           |                                   |
| 10         | WFHAIHVSGTNGTKR    |           |                                   |
| 11         | SGTNGTKRFDNPVLP    |           |                                   |
| 12         | RFDNPVLPFNDGVYF    |           |                                   |
| 13         | PFNDGVYFASTEKSN    |           |                                   |
| 14         | FASTEKSNIIRGWIF    |           |                                   |
| 15         | NIIRGWIFGTTLDSK    |           |                                   |
| 16         | FGTTLDSKTQSLIV     |           |                                   |
| 17         | KTQSLIVNNATNVV     |           |                                   |
| 18         | VNNATNVVIKVCEFQ    |           |                                   |
| 19         | VIKVCEFQFCNDPFL    |           |                                   |
| 20         | QFCNDPFLGVYYHKN    |           |                                   |
| 21         | LGVYYHKNNKSWMES    |           |                                   |
| 22         | NNKSWMESEFRVYSS    |           |                                   |
| 23         | SEFRVYSSANNCTFE    |           |                                   |
| 24         | SANNCTFEYVSQPFL    |           |                                   |
| 25         | EYVSQPFLMDLEGKQ    |           |                                   |
| 26         | MDLEGKQGNFKNLR     |           |                                   |
| 27         | QGNFKNLREFVFKNI    |           |                                   |
| 28         | REFVFKNIDGYFKIY    |           |                                   |
| 29         | IDGYFKIYSKHTPIN    |           |                                   |
| 30         | YSKHTPINLVRDLPQ    |           |                                   |
| 31         | NLVRDLPQGFSALEP    |           |                                   |
| 32         | QGFSALEPLVDLPIG    |           |                                   |
| 33         | PLVDLPIGINITRFQ    |           |                                   |
| 34         | GINITRFQTLLALHR    |           |                                   |
| 35         | QTLLALHRSYLTTPGD   |           |                                   |

|    |                 |  |
|----|-----------------|--|
| 36 | RSYLTPGDSSSGWTA |  |
| 37 | DSSSGWTAGAAAYYV |  |
| 38 | AGAAAYYVGYLQPR  |  |
| 39 | VGYLQPRTFLLKYNE |  |
| 40 | TFLLKYNENGTITDA |  |
| 41 | ENGTITDAVDCALDP |  |
| 42 | AVDCALDPLSETKCT |  |
| 43 | PLSETKCTLKSFTVE |  |
| 44 | TLKSFTVEKGIYQTS |  |
| 45 | EKGIYQTSNFRVQPT |  |
| 46 | SNFRVQPTESIVRFP |  |
| 47 | TESIVRFPNITNLCP |  |
| 48 | PNITNLCPFGEVFNA |  |
| 49 | PFGEVFNATRFASVY |  |
| 50 | ATRFASVYAWNKRRI |  |
| 51 | YAWNKRKISNCVADY |  |
| 52 | ISNCVADYSVLYNSA |  |
| 53 | YSVLYNSASFSTFKC |  |
| 54 | ASFSTFKCYGVSP   |  |
| 55 | CYGVSP          |  |
| 56 | KLNDLCFTNVYADSF |  |
| 57 | TNVYADSFVIRGDEV |  |
| 58 | FVIRGDEV        |  |
| 59 | VRQIAPGQTGKIADY |  |
| 60 | QTGKIADYNYKLPDD |  |
| 61 | YNYKLPDDFTGCVIA |  |
| 62 | DFTGCVIAWNSNNLD |  |
| 63 | AWNSNNLDSKVGGNY |  |
| 64 | DSKVGGNYNYLYRLF |  |
| 65 | YNYLYRLF        |  |
| 66 | FRKSNLKP        |  |
| 67 | PFERDISTEIQAGS  |  |
| 68 | TEIQAGSTPCNGVE  |  |
| 69 | STPCNGVEGFNCYFP |  |
| 70 | EGFNCYFP        |  |
| 71 | PLQSYGFQPTNGVGY |  |
| 72 | QPTNGVGYQP      |  |
| 73 | YQP             |  |
| 74 | VLSFELLHAPATVCG |  |
| 75 | HAPATVCGPKKSTNL |  |

Pool #2  
(48)

|    |                 |  |  |
|----|-----------------|--|--|
| 76 | GPKKSTNLVKNKCVN |  |  |
| 77 | LVKNKCVNFNFNGLT |  |  |
| 78 | NFNFNGLTGTGVLTE |  |  |
| 79 | TGTGVLTESNKKFLP |  |  |
| 80 | ESNKKFLPFQQFGRD |  |  |
| 81 | PFQQFGRDIADTTDA |  |  |
| 82 | DIADTTDAVRDPQTL |  |  |
| 83 | AVRDPQTLEILDITP |  |  |
| 84 | LEILDITPCSFGGVS |  |  |
| 85 | PCSFGGVSVITPGTN |  |  |
| 86 | SVITPGTNTSNQVAV |  |  |
| 87 | NTSNQVAVLYQDVNC |  |  |
| 88 | VLYQDVNCTEVPVAI |  |  |
| 89 | CTEVPVAIHADQLTP |  |  |
| 90 | IHADQLTPTWRVYST |  |  |
| 91 | PTWRVYSTGSNVFQT |  |  |
| 92 | TGSNVFQTRAGCLIG |  |  |
| 93 | TRAGCLIGAEHVNNS |  |  |
| 94 | GAEHVNNSYECDIPI |  |  |
| 95 | SYECDIPIGAGICAS |  |  |
| 96 | IGAGICASYQTQTN  |  |  |
| 97 | SYQTQTNSPRRARSV |  |  |

| Peptide ID | Sequence (N' - C') | Subunit | Pool<br>(No. of peptides in<br>pool) |
|------------|--------------------|---------|--------------------------------------|
| 98         | SPRRARSVASQSIIA    | S2      | Pool #3<br>(38)                      |
| 99         | VASQSIIAYTMSLGA    |         |                                      |
| 100        | AYTMSLGAENSVAYS    |         |                                      |
| 101        | AENSVAYSNNNSIAIP   |         |                                      |
| 102        | SNNSIAIPTNFTISV    |         |                                      |
| 103        | PTNFTISVTTEILPV    |         |                                      |
| 104        | VTTEILPVSMTKTSV    |         |                                      |
| 105        | VSMTKTSVDCTMYIC    |         |                                      |
| 106        | VDCTMYICGDSTEC     |         |                                      |
| 107        | CGDSTECNLLLQYG     |         |                                      |
| 108        | SNLLLQYGSFCTQLN    |         |                                      |
| 109        | GSFCTQLNRALTGIA    |         |                                      |
| 110        | NRALTGIAVEQDKNT    |         |                                      |
| 111        | AVEQDKNTQEVEFAQV   |         |                                      |
| 112        | TQEVEFAQVKQIYKTP   |         |                                      |
| 113        | VKQIYKTPPIKDFGG    |         |                                      |
| 114        | PPIKDFGGFNFSQIL    |         |                                      |
| 115        | GFNFSQILPDPSKPS    |         |                                      |
| 116        | LPDPSKPSKRSFIED    |         |                                      |
| 117        | SKRSFIEDLLFNKVT    |         |                                      |
| 118        | DLLFNKVTLADAGFI    |         |                                      |
| 119        | TLADAGFIKQYGDCL    |         |                                      |
| 120        | IKQYGDCLGDIAARD    |         |                                      |
| 121        | LGDIAARDLICAQKF    |         |                                      |
| 122        | DLICAQKFNGLTVLP    |         |                                      |
| 123        | FNGLTVLPPLLTDEM    |         |                                      |
| 124        | PPLLTDEMIAQY TSA   |         |                                      |
| 125        | MIAQYTSALLAGTIT    |         |                                      |
| 126        | ALLAGTITSGWTFGA    |         |                                      |
| 127        | TSGWTFGAGAALQIP    |         |                                      |
| 128        | AGAALQIPFAMQMAY    |         |                                      |
| 129        | PFAMQMAYRFNGIGV    |         |                                      |
| 130        | YRFNGIGVTQNVLYE    |         |                                      |
| 131        | VTQNVLYENQKLIAN    |         |                                      |
| 132        | ENQKLIANQFN SAIG   |         |                                      |
| 133        | NQFN SAIGKIQDSL    |         |                                      |
| 134        | GKIQDSLSTASALG     |         |                                      |

|     |                 |       |  |
|-----|-----------------|-------|--|
| 135 | SSTASALGKLQDVVN |       |  |
| 136 | GKLQDVVNQNAQALN |       |  |
| 137 | NQNAQALNTLVKQLS |       |  |
| 138 | NTLVKQLSSNFGAIS |       |  |
| 139 | SSNFGAISSVLNDIL |       |  |
| 140 | SSVLNDILSRLDKVE |       |  |
| 141 | LSRLDKVEAEVQIDR |       |  |
| 142 | EAEVQIDRLITGRLQ |       |  |
| 143 | RLITGRLQSLQTYVT |       |  |
| 144 | QSLQTYVTQQLIRAA |       |  |
| 145 | TQQLIRAAEIRASAN |       |  |
| 146 | AEIRASANLAATKMS |       |  |
| 147 | NLAATKMSECVLGQS |       |  |
| 148 | SECVLGQSKRVDFCG |       |  |
| 149 | SKRVDFCGKGYHLMS |       |  |
| 150 | GKGYHLMSFPQSAPH |       |  |
| 151 | SFPQSAPHGVVFLHV |       |  |
| 152 | HGVVFLHVTYVPAQE |       |  |
| 153 | VTYVPAQEKNFTTAP |       |  |
| 154 | EKNFTTAPAICHDGK |       |  |
| 155 | PAICHDGKAHFPREG |       |  |
| 156 | KAHFPREGVFVSNGT |       |  |
| 157 | GVFVSNGTHWFVTQR |       |  |
| 158 | THWFVTQRNFYEPQI |       |  |
| 159 | RNFYEPQIITTDNTF |       |  |
| 160 | IITTDNTFVSGNCDV |       |  |
| 161 | FVSGNCDVVIGIVNN |       |  |
| 162 | VVIGIVNNTVYDPLQ |       |  |
| 163 | NTVYDPLQPELDSFK |       |  |
| 164 | QPELDSFKEELDKYF |       |  |
| 165 | KEELDKYFKNHTSPD |       |  |
| 166 | FKNHTSPDVDLGDIS |       |  |
| 167 | DVDLGDISGINASVV |       |  |
| 168 | SGINASVVNIQKEID |       |  |
| 169 | VNIQKEIDRLNEVAK |       |  |
| 170 | DRLNEVAKNLNESLI |       |  |
| 171 | KNLNESLIDLQELGK |       |  |
| 172 | IDLQELGKYEQYIKW |       |  |
| 173 | KYEQYIKWPWYIWL  |       |  |
| 174 | WPWYIWLGFIAGLIA |       |  |
|     |                 | TM&CT |  |

Pool #4  
(38)



|     |                 |                                                                                                                                             |
|-----|-----------------|---------------------------------------------------------------------------------------------------------------------------------------------|
| 175 | GFIAGLIAIVMVTIM | Not used in this study<br>because the vaccine<br>candidates do not<br>contain the<br>transmembrane-<br>cytoplasmic tail of<br>spike protein |
| 177 | MLCCMTSCCCLKGC  |                                                                                                                                             |
| 178 | CCSCLKGCCSCGSCC |                                                                                                                                             |
| 179 | CCSCGSCCKFDEDDS |                                                                                                                                             |
| 180 | CKFDEDDSEPVLKGV |                                                                                                                                             |
| 181 | SEPVLKGVKLHYT   |                                                                                                                                             |
